# Supplementary material for: Cross-Reactivity of Human, Wild Boar, and Farm Animal Sera from Pre- and Post-Pandemic Periods with Alpha- and Βeta-Coronaviruses (CoV), including SARS-CoV-2
Source: MDPI journal article supplement (doi:10.3390/v16010034), 2023-12-23
Supplement: s1 [file s1]

## Supplementary Figure S1

Effect of anti-S2-WBVR3 IgG antibodies on infection process (% Entry) of vesicular stomatitis virus (VSV) pseudo-typed with WT and variants of the spike protein of SARS-CoV-2.

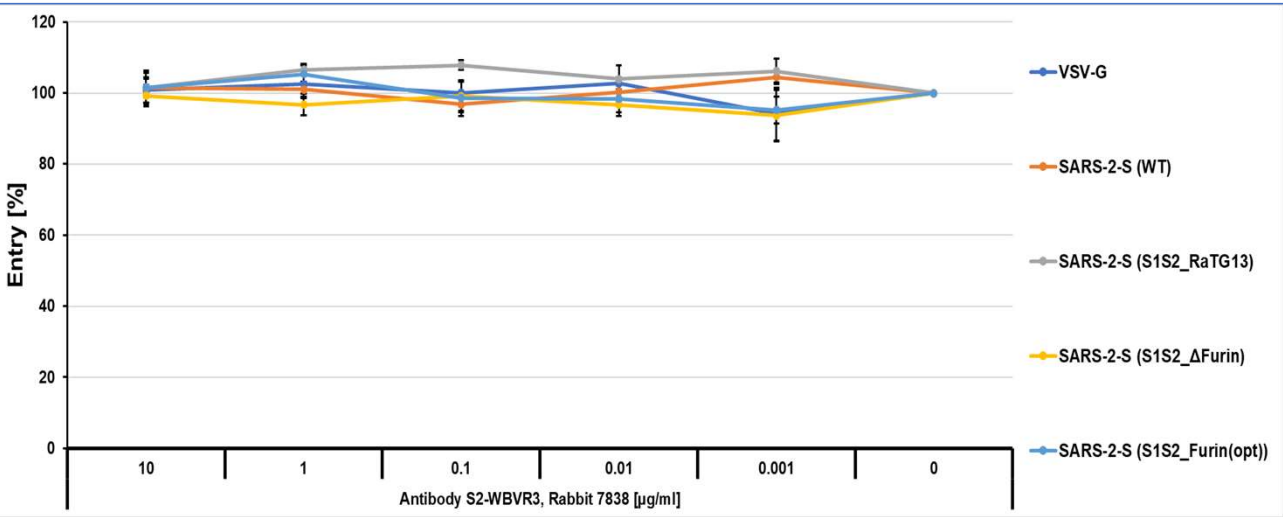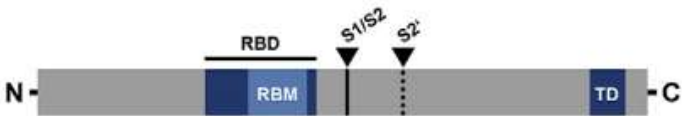

|                  | S1/S2 |          |         |             |
|------------------|-------|----------|---------|-------------|
| SARS-S (wt)      | 661   | - HTV    | SLL---- | R STS - 670 |
| SARS-S (SARS-2)  | 663   | - HTQTNS | PRRAR   | STS - 674   |
| SARS-S (RaTG)    | 661   | - HTQTNS | ----    | R STS - 670 |
|                  |       |          |         |             |
| SARS-2-S (wt)    | 684   | - QTQTNS | PRRAR   | SVA - 697   |
| SARS-2-S (SARS)  | 675   | - QTV    | SLL---- | R SVA - 684 |
| SARS-2-S (RaTG)  | 684   | - QTQTNS | ----    | R SVA - 693 |
| SARS-2-S (delta) | 684   | - QTQTNS | P----   | A SVA - 694 |
| SARS-2-S (opt)   | 684   | - QTQTNS | RRRRKR  | SVA - 697   |

**SARS-S and SARS-2-S S1/S2 mutants analyzed** (for detailed information see Fig. 2A. in "A Multibasic Cleavage Site in the Spike Protein of SARS-CoV-2 Is Essential for Infection of Human Lung Cells": Hoffmann et. al. Mol Cell. 2020;78(4):779-784.e5(reference 27) .

Experiments conducted by Dr. Markus Hoffmann's lab. German Primate Center, Infection Biology Unit, Göttingen.

Supplementary Table S1. Origin of human and animal sera tested in this study

| species                  | age       | year      | collected before<br>(pre) or after start<br>pandemic (post) | # sera | notation used in tables<br>and figures | source                                                                                 |
|--------------------------|-----------|-----------|-------------------------------------------------------------|--------|----------------------------------------|----------------------------------------------------------------------------------------|
| <b>field sera</b>        |           |           |                                                             |        |                                        |                                                                                        |
| <b>Human</b>             | adult     | 2018      | pre                                                         | 30     | H-ETZ-P#                               | random patients ETZ hospital NL                                                        |
|                          | adult     | 2018      | pre                                                         | 22     | H-ETZ-F#                               | pig farmers North Brabant region NL                                                    |
|                          | adult     | 2020      | post                                                        | 5      | H-WBVR#                                | lab workers WBVR NL, PCR-negative for SARS-CoV-2                                       |
|                          | adult     | 2020      | post                                                        | 6      | H-WBVR#                                | lab workers WBVR NL, PCR-positive for SARS-CoV-2                                       |
|                          | adult     | 2020-2021 | post                                                        | 12     | H-ETZ-IC#                              | IC patients ETZ hospital NL, PCR positive for SARS-CoV-2 (autumn and winter 2020-2021) |
|                          | adult     | 2020      | post                                                        | 60     | H-ETZ-W#                               | hospital workers ETZ hospital NL, PCR positive for SARS-CoV-2 (April and May 2020)     |
| <b>Rabbit</b>            | 5-7 wks   | 2019      | pre                                                         | 4      | R-H#                                   | pre-serum laboratory rabbits "high health husbandry"                                   |
|                          | 5-7 wks   | 2019-2020 | pre                                                         | 20     | R-R#                                   | pre-sera laboratory rabbits "regular husbandry"                                        |
| <b>Pig</b>               | adult     | 2007      | pre                                                         | 20     | P-F#                                   | finishing pigs regular slaughterhouse NL                                               |
|                          | 10-12 wks | 2006      | pre                                                         | 9      | P-Exp#                                 | regular farm NL (used in a Hepatitis E virus transmission experiment)                  |
|                          | 6-7 wks   | 2021      | post                                                        | 21     | P-P#                                   | weaned piglets farm NL (same farm as P-S)                                              |
|                          | adult     | 2021      | post                                                        | 6      | P-S#                                   | (pregnant-) sows pig farm NL (same farm as P-P)                                        |
|                          | 12-20 wks | 2021      | post                                                        | 56     | P-FA#                                  | fattening pigs 2 regular farms of same owner NL (28 of each farm)                      |
| <b>Wild boar</b>         | unknown   | 2018      | pre                                                         | 43     | WB-V#                                  | sera hunted wild boar collected in Veluwe area NL (2018 week 1 through week 52)        |
|                          | unknown   | 2018      | pre                                                         | 47     | WB-P#                                  | sera hunted wild boar in Peel area NL (2018 week 1 through week 52)                    |
|                          | unknown   | 2021-2022 | post                                                        | 64     | WB-V#                                  | sera hunted wild boar in Veluwe area NL (januari 2021 until march 2022)                |
|                          | unknown   | 2021-2022 | post                                                        | 114    | WB-P#                                  | sera hunted wild boar in Peel area NL (januari 2021 until march 2022)                  |
| <b>Cow</b>               | adult     | 2010      | pre                                                         | 16     | C-M#                                   | milk cows of 3 farms NL                                                                |
| <b>Sheep</b>             | adult     | 2012      | pre                                                         | 11     | S-H#                                   | 2, 4 and 5 from 3 different local herds NL                                             |
|                          | adult     | 2012      | pre                                                         | 10     | S-SPF#                                 | SPF herd INRA France                                                                   |
| <b>Goat</b>              | adult     | 2019      | pre                                                         | 20     | G#                                     | 2 different farms NL (10 of each farm)                                                 |
| <b>experimental sera</b> |           |           |                                                             |        |                                        |                                                                                        |
| <b>Rabbit</b>            | 20 wks    | 2020      | NA                                                          | 1      | $\alpha$ S2'-IgG                       | affinity-purified rabbit IgG's directed against S2 peptide WBVR3                       |
|                          | 20 wks    | 2020      | NA                                                          | 1      | R $\alpha$ SARS-CoV-2 NP (+C)          | positive control serum for SARS-CoV 1&2 NP ELISA (see reference 27)                    |
|                          | 20 wks    | 2020      | NA                                                          | 1      | R $\alpha$ SARS-CoV-2 S (+C)           | positive control serum for SARS-CoV 1&2 S ELISA (see reference 27)                     |
| <b>Cow</b>               | 1d        | 2021      | NA                                                          | 4      | C-CD#                                  | CD-CD calves WBVR                                                                      |
| <b>Syrian hamster</b>    | 7 wks     | 2020      | NA                                                          | 1      | HAM-d0                                 | pre-serum hamster before infection with SARS-CoV-2 (0 d) (see reference 27)            |
|                          | 10 wks    | 2020      | NA                                                          | 1      | HAM-d21                                | hamster experimentally infected with SARS-CoV-2 (21 d.p.i.) (see reference 27)         |
| <b>Pig</b>               | adult     | 2006      | NA                                                          | 1      | P-PHEVg                                | PHEV immunized pig (gift Univ. of Gent Belgium)                                        |
|                          | adult     | unknown   | pre                                                         | 1      | P-PHEVm                                | PHEV immunized pig (gift Univ. of Minnesota USA)                                       |
|                          | piglet    | 1989      | NA                                                          | 1      | P-PRCTGEVm                             | experimental infection with PRCV/TGEV strain Miller                                    |
|                          | piglet    | 1988      | NA                                                          | 1      | P-TGEVp                                | experimental infection with TGEV strain Purdue                                         |
|                          | piglet    | 1988      | NA                                                          | 1      | P-PEDV                                 | experimental infection with PEDV strain CV777                                          |
|                          | 1d        | 2019      | NA                                                          | 1      | P-CDpool                               | pooled sera of CD-CD piglets WBVR                                                      |

**Supplementary Figure S2:** Validation of TGEV neutralization assay with sera from (experimentally) infected animals and human lab workers WBVR.

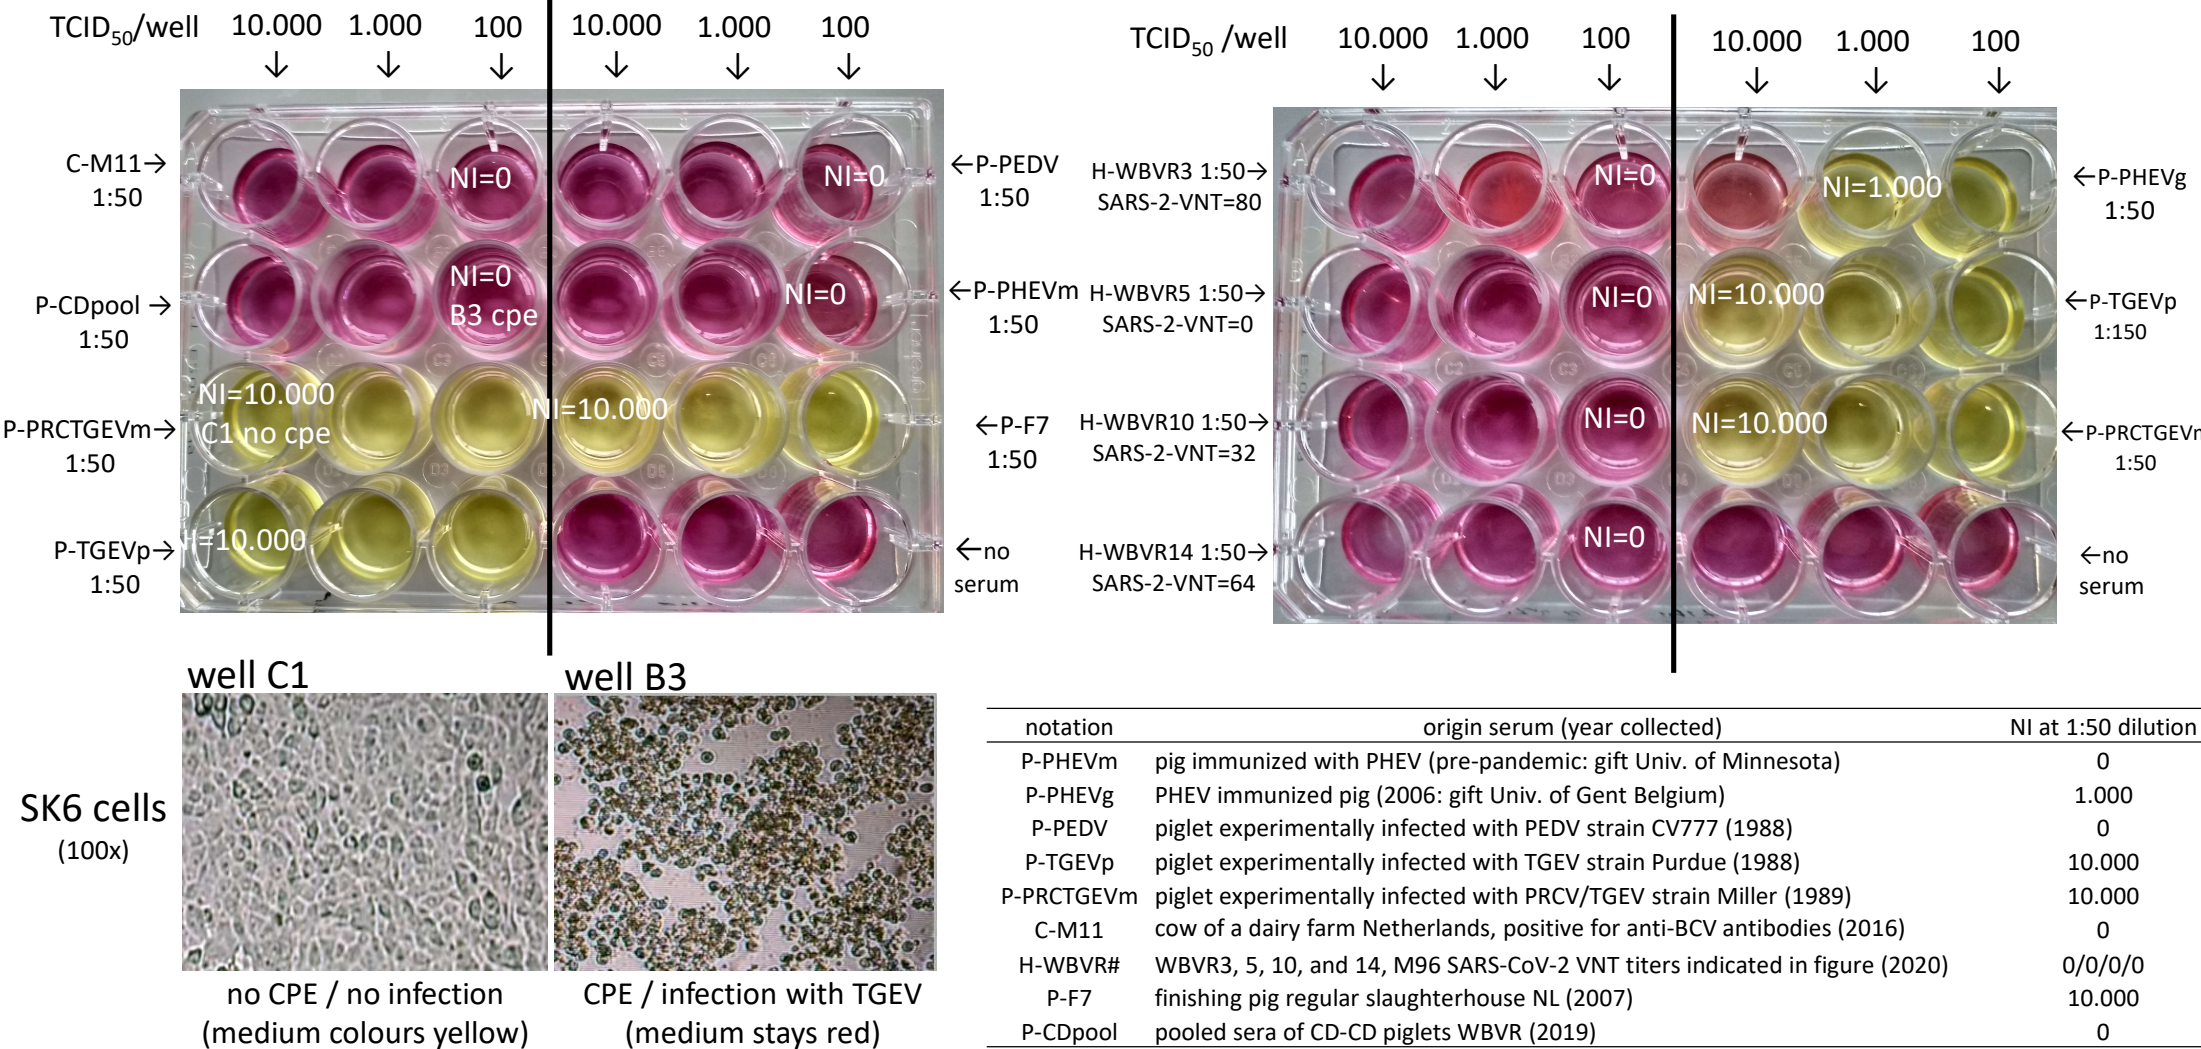



Supplementary Figure S3: Immune staining of PHEV infected SK6

cells **A** : Staining of PHEV infected and mock infected SK6 cells

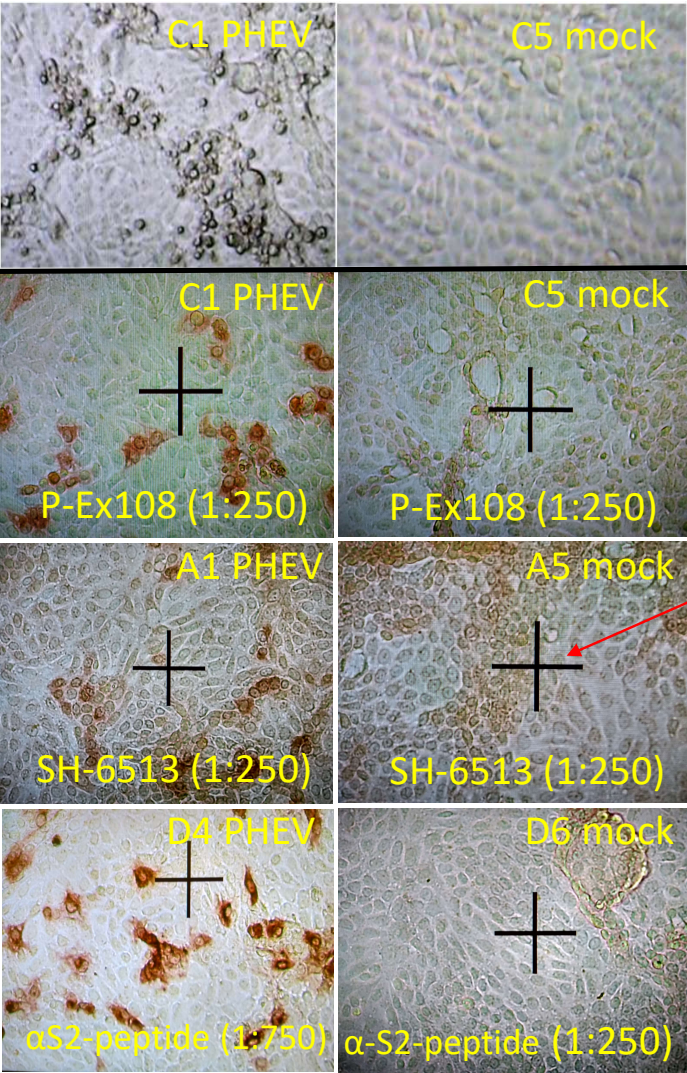

**before staining**  
-left picture: CPE induced by PHEV 4 dpi. (appearance of clusters of apoptotic cells)  
-right picture: mock infected cells.

**Stained**

+ marks the centre of a well (no indication for positive staining!)

**B** : Detection of positive and negative PHEV staining based on detected number of infected foci per 2 cm<sup>2</sup> well (blue counts) using the AID vSpot imaging apparatus (AID Autoimmun Diagnostika GmbH, Strassberg, Germany).

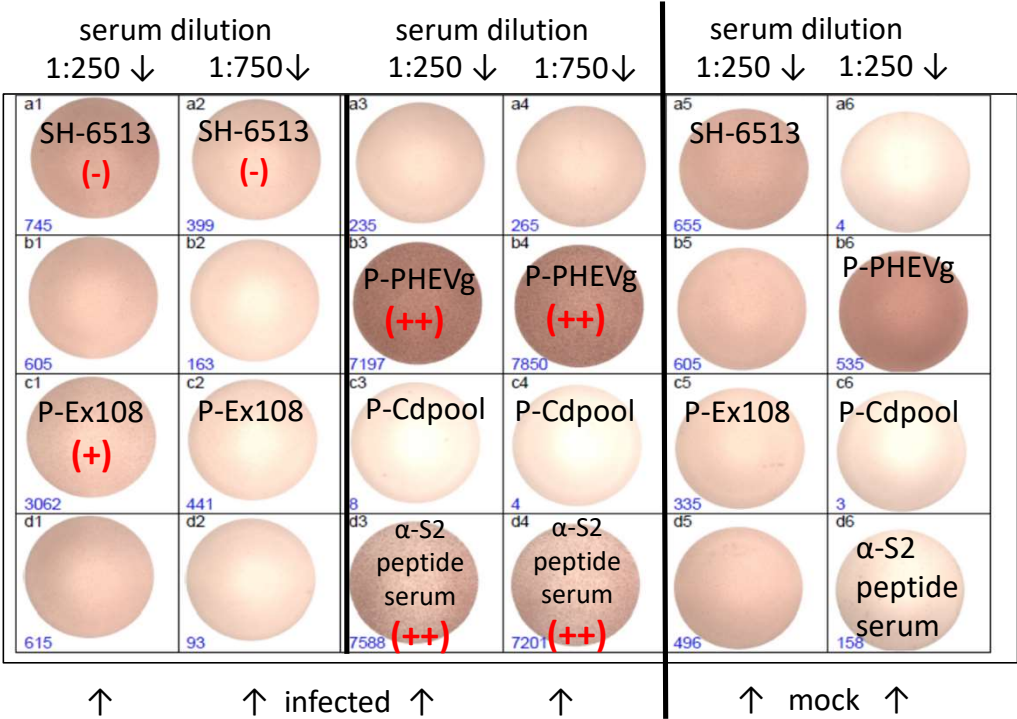

| serum        | # foci infected<br>1:250 | # foci infected<br>1:750 | # foci mock<br>1:250 | PN value 1:250*<br>(# infected/mock) | PN value 1:750*<br>(# infected/mock) | PN>5 at dilution <sup>§</sup> | notation <sup>&amp;</sup> |
|--------------|--------------------------|--------------------------|----------------------|--------------------------------------|--------------------------------------|-------------------------------|---------------------------|
| SH-6513      | 745                      | 399                      | 655                  | 1.1                                  | 0.6                                  | No                            | (-)                       |
| P-Exp108     | 3062                     | 441                      | 335                  | 9.1                                  | 1.3                                  | 1:250                         | +                         |
| α-S2-peptide | 7588                     | 7201                     | 158                  | 48.0                                 | 45.6                                 | 1:750                         | ++                        |
| P-PHEVg      | 7179                     | 7850                     | 605                  | 11.9                                 | 13.0                                 | 1:750                         | ++                        |
| P-Cdpool     | 8                        | 4                        | 3                    | 2.7                                  | 1.3                                  | No                            | (-)                       |

\*PN value: number of foci detected in infected wells at dilution of 1:250 or 1:750 divided by the number of foci in mock infected cells at an dilution of 1:250

<sup>§</sup> serum dilution scoring a PN value >5

<sup>&</sup> scores: (++) 1:750 dilution of serum scoring a PN value >5, (+) 1:250 dilution scoring a PN value >5 and 1:750 does not, (-) PN<5 at serum dilution of 1:250.

Supplementary Figure S4A: Chi-square statistics of BCV-NI and staining of PHEV infected SK6 cells of data displayed in Figure S4.

Statistical analysis

Fig 4A Chi-square statistics

Results chi-square statistics of BCV neutralisation by pre-and post-pandemic human sera

| category →                           | BCV NI=0          | BCV NI=50         | BCV NI=500        | BCV NI=5000       | total # sera      |
|--------------------------------------|-------------------|-------------------|-------------------|-------------------|-------------------|
| serum panels                         |                   |                   |                   |                   |                   |
| H-ETZ + WBVR SARS-CoV-2 convalescent | 17 (25.80) [3.00] | 11 (15.60) [1.36] | 14 (12.00) [0.33] | 36 (24.60) [5.28] | 78                |
| H-ETZ pre-pandemic                   | 26 (17.20) [4.50] | 15 (10.40) [2.03] | 6 (8.00) [0.50]   | 5 (16.40) [7.92]  | 52                |
| # sera per category →                | 43                | 26                | 20                | 41                | 130 (Grand Total) |

DF=3, Critical  $\chi^2$ =7.82 at an alpha of 5%

The chi-square statistic is 24.9356. The p-value is .000016. The result is significant at  $p < .05$ .

The contingency table above provides the following information: the observed number of sera per BCV-NI category, (the expected cell totals) and [the chi-square statistic for each cell].

Results chi-square statistics BCV neutralisation by pre-and post-pandemic wild boar sera

| category →            | BCV NI=0            | BCV NI=50         | BCV NI=500        | BCV NI=5000       | total # sera      |
|-----------------------|---------------------|-------------------|-------------------|-------------------|-------------------|
| serum panels          |                     |                   |                   |                   |                   |
| WB post-pandemic      | 122 (128.03) [0.28] | 12 (15.42) [0.76] | 20 (16.76) [0.63] | 31 (24.80) [1.55] | 185               |
| WB pre-pandemic       | 69 (62.97) [0.58]   | 11 (7.58) [1.54]  | 5 (8.24) [1.28]   | 6 (12.20) [3.15]  | 91                |
| # sera per category → | 191                 | 23                | 25                | 37                | 276 (Grand Total) |

DF=3, Critical  $\chi^2$ =7.82 at an alpha of 5%

The chi-square statistic is 9.7598. The p-value is .020723. The result is significant at  $p < .05$ .

The contingency table above provides the following information: the observed number of sera per BCV-NI category, (the expected cell totals) and [the chi-square statistic for each cell].

Fig 4B Chi-square statistics

Results chi-square statistics of PHEV staining by pre-and post-pandemic human sera

| category →                           | no staining [-]   | staining at [1:250] | staining at [1:750] | total # sera      |
|--------------------------------------|-------------------|---------------------|---------------------|-------------------|
| serum panels                         |                   |                     |                     |                   |
| H-ETZ + WBVR SARS-CoV-2 convalescent | 18 (24.00) [1.50] | 22 (24.75) [0.31]   | 38 (29.25) [2.62]   | 78                |
| H-ETZ pre-pandemic                   | 14 (8.00) [4.50]  | 11 (8.25) [0.92]    | 1 (9.75) [7.85]     | 26                |
| # sera per category →                | 32                | 33                  | 39                  | 104 (Grand Total) |

DF=2, Critical  $\chi^2$ =5.99 at an alpha of 5%

The chi-square statistic is 17.6923. The p-value is .000144. The result is significant at  $p < .05$ .

The contingency table above provides the following information: the observed number of sera per PHEV-staining category, (the expected cell totals) and [the chi-square statistic for each cell].

Results chi-square statistics of PHEV staining by pre-and post-pandemic wild boar sera

| category →            | no staining [-]   | staining at [1:250] | staining at [1:750] | total # sera     |
|-----------------------|-------------------|---------------------|---------------------|------------------|
| serum panels          |                   |                     |                     |                  |
| WB post-pandemic      | 16 (12.49) [0.99] | 1 (4.34) [2.57]     | 2 (2.17) [0.01]     | 19               |
| WB pre-pandemic       | 7 (10.51) [1.17]  | 7 (3.66) [3.06]     | 2 (1.83) [0.02]     | 16               |
| # sera per category → | 23                | 8                   | 4                   | 35 (Grand Total) |

DF=2, Critical  $\chi^2$ =5.99 at an alpha of 5%

The chi-square statistic is 7.8221. The p-value is .02002. The result is significant at  $p < .05$ .

The contingency table above provides the following information: the observed number of sera per PHEV-staining category, (the expected cell totals) and [the chi-square statistic for each cell].

Fig 4C Chi-square statistics

Results chi-square statistics of BCV neutralisation by post-pandemic wild boar sera from two different locations in the Netherland

| category →                           | BCV NI=0          | BCV NI=50        | BCV NI=500        | BCV NI=5000       | total # sera      |
|--------------------------------------|-------------------|------------------|-------------------|-------------------|-------------------|
| post-pandemic Wild boar serum panels |                   |                  |                   |                   |                   |
| WB Peel rgion                        | 65 (74.29) [1.16] | 10 (7.69) [0.70] | 14 (12.17) [0.28] | 25 (19.85) [1.33] | 114               |
| WB Veluwe region                     | 51 (41.71) [2.07] | 2 (4.31) [1.24]  | 5 (6.83) [0.49]   | 6 (11.15) [2.38]  | 64                |
| # sera per category →                | 116               | 12               | 19                | 31                | 178 (Grand Total) |

DF=3, Critical  $\chi^2$ =7.82 at an alpha of 5%

The chi-square statistic is 9.6476. The p-value is .021812. The result is significant at  $p < .05$ .

The contingency table above provides the following information: the observed number of sera per BCV-NI category, (the expected cell totals) and [the chi-square statistic for each cell].

**Supplementary Figure S4B:** SARS-CoV-2 VNT titer versus BCoV-NI (A) and staining of PHEV infected SK6 cells (B).

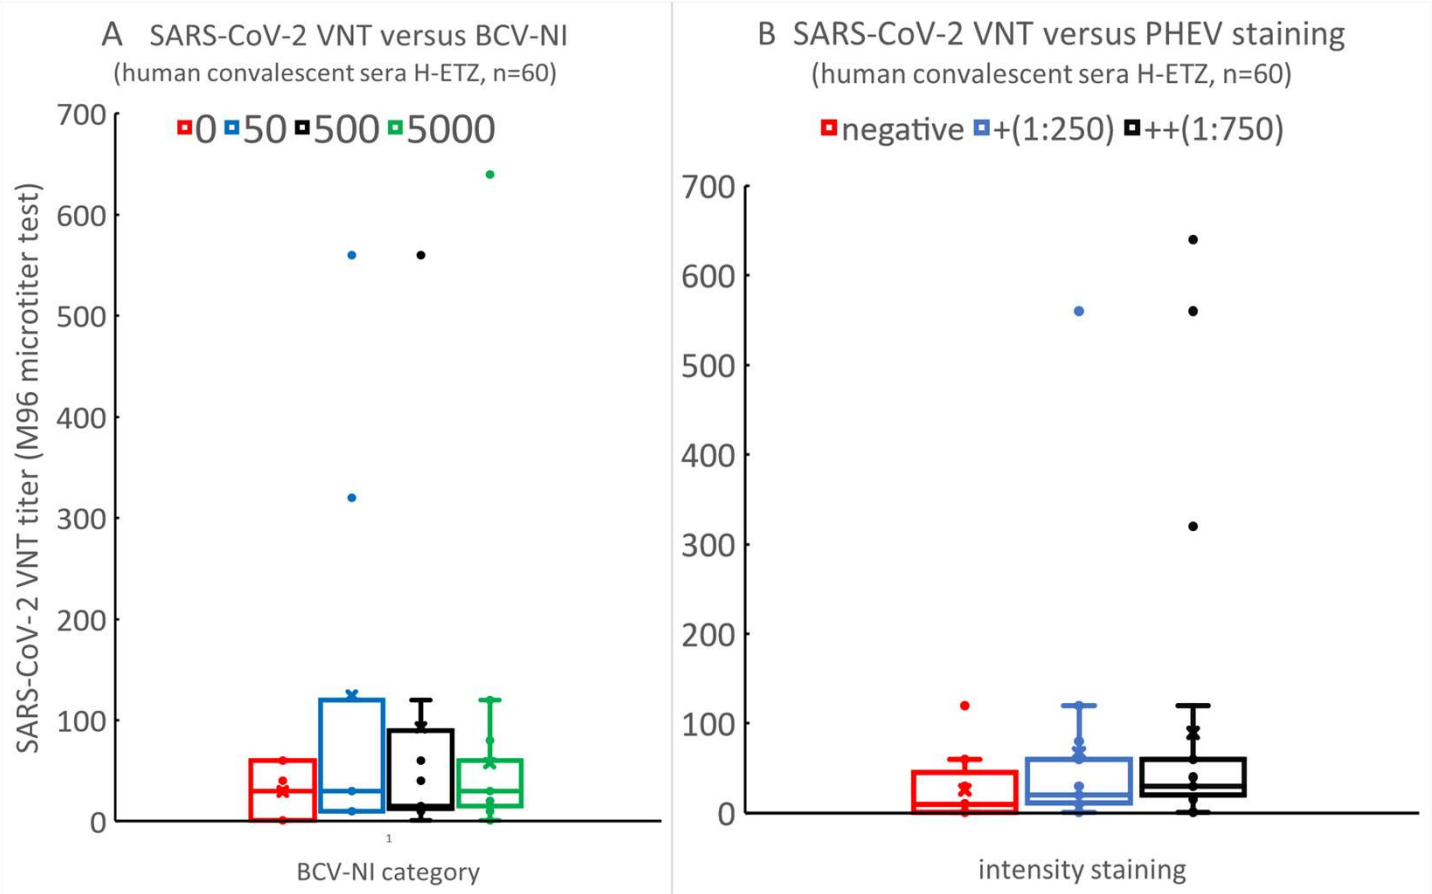

**Supplementary Figure S5:** Map of Veluwe and Peel regions in the Netherlands (locations of hunted wild boars).

Pre-pandemic sera (n=91)

n=47 Peel region, n=43 Veluwe region and 1 serum collected outside both these region. Hunted in 2018

Post-pandemic sera (n=185)

n= 114 Peel region, n=64 Veluwe region and 7 sera collected outside both these regions.

Hunted during the 2-4<sup>th</sup> wave of human Covid-19 disease in the Netherlands (January 2021 till March 2022).

Veluwe region (national park)

- forest and little urbanization
- limited and controlled public access

Peel region

- mix of forest and urban areas
- free public access

Wild boar population  
Netherlands

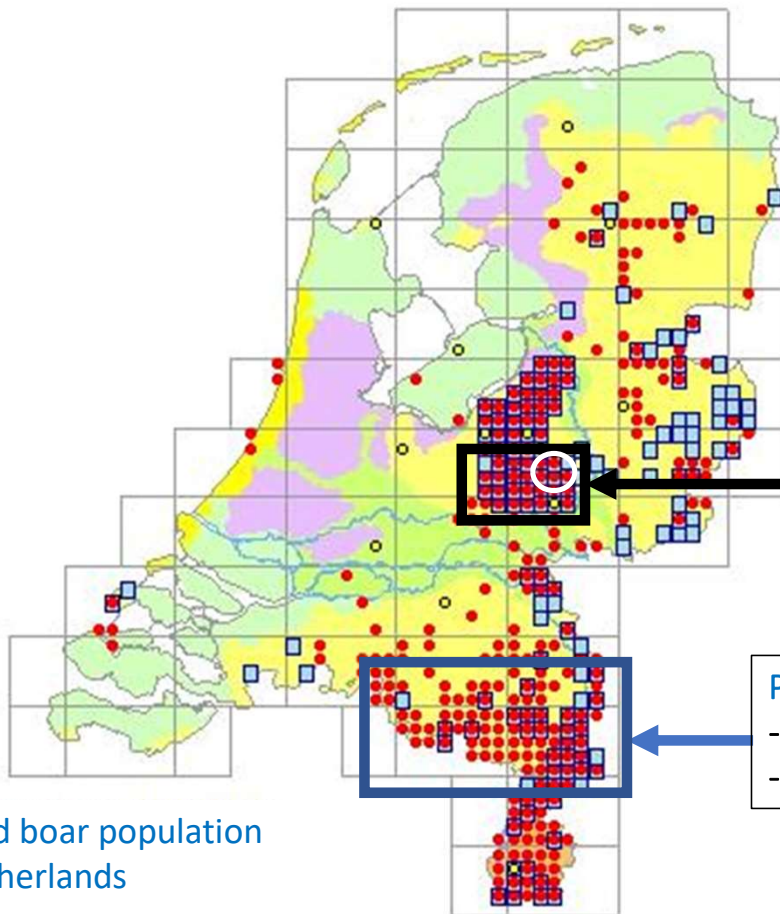

**Supplementary Table S2. Species-specific HRP-conjugates used as secondary antibodies for immune-staining of virus-infected cells and ELISA's .**

| species   | HRP conjugate                                                     | reference - firm - location                            |
|-----------|-------------------------------------------------------------------|--------------------------------------------------------|
| cow       | Rabbit anti-Bovine IgG (H+L) Secondary Antibody, HRP              | Thermo-fischer scientific - Bleiswijk, The Netherlands |
| hamster   | Rabbit anti-Syrian Hamster IgG (H+L) Secondary Antibody, HRP      | Thermo-fischer scientific - Bleiswijk, The Netherlands |
| human     | Goat-anti-Human-IgG-IgM-IgA-H-L-Secondary-Antibody-Polyclonal HRP | Thermo-fischer scientific - Bleiswijk, The Netherlands |
| pig       | Monoclonal antibody Anti-Swine Ig-L 27.2.1 WBVR                   | reference 31                                           |
| rabbit    | Goat Anti-Rabbit Immunoglobulins/HRP" (Dako)                      | Agilent - Abcoude the Netherlands                      |
| wild boar | Monoclonal antibody Anti-Swine Ig-L 27.2.1 WBVR                   | reference 31                                           |
| sheep     | Rabbit anti-Sheep IgG (H+L) Secondary Antibody, HRP               | Thermo-fischer scientific - Bleiswijk, The Netherlands |
